# Supplementary material
Source: HighWire-hosted journal article supplement (https://ez-admanager.com/highwire/filestream/135934/field_highwire_adjunct_files/0/french_950.pdf)
Supplement: french_950.pdf [file french_950.pdf]

# Perampanel para crisis tónico-clónicas en epilepsia generalizada idiopática

Un ensayo aleatorizado

Jacqueline A. French, MD  
Gregory L. Krauss, MD  
Robert T. Wechsler, MD, PhD  
Xue-Feng Wang, MD  
Bree DiVentura, MBA  
Christian Brandt, MD  
Eugen Trinka, MD, MSc  
Terence J. O'Brien, MD, BS  
Antonio Laurenza, MD  
Anna Patten, PhD  
Francesco Bibbiani, MD

Dirección para correspondencia y solicitud de separatas al Dr. French: jacqueline.french@nyumc.org

## RESUMEN

**Objetivo:** Evaluar la eficacia y seguridad del tratamiento adyuvante con perampanel en pacientes con crisis tónico-clónicas generalizadas primarias (TCGP), fármaco-resistentes, en epilepsia generalizada idiopática (EGI).

**Métodos:** En este estudio doble ciego multicéntrico (ClinicalTrials.gov identificador: NCT01393743; financiado por Eisai Inc.), pacientes de 12 años o más con crisis TCGP y EGI fueron aleatorizados a placebo o perampanel durante un período de dosificación de 4 semanas (perampanel en dosis en aumento de 2 a 8 mg/d o la mayor dosis tolerada) y un período de mantenimiento de 13 semanas. El punto final primario fue el porcentaje de cambio en la frecuencia de crisis TCGP en 28 días (dosificación más mantenimiento vs basal). El punto final secundario clave (punto final primario para el registro de la Unión Europea) fue la tasa de respuesta del 50% de las crisis TCGP (pacientes que lograron una reducción  $\geq 50\%$  en la frecuencia de crisis TCGP; mantenimiento vs basal). Los eventos adversos emergentes del tratamiento fueron monitorizados.

**Resultados:** De 164 pacientes aleatorizados, 162 conformaron el grupo de análisis completo (placebo, 81; perampanel, 81). Comparado al placebo, el perampanel confirmó una mediana mayor en el porcentaje de cambio de la frecuencia de crisis TCGP en 28 días (-38,4% vs -76,5%;  $p < 0,0001$ ) y mayor tasa de respuesta del 50% de las crisis TCGP (39,5% vs 64,2%;  $p = 0,0019$ ). Durante el mantenimiento, 12,3% de los pacientes tratados con placebo y 30,9% de los tratados con perampanel quedaron libres de crisis TCGP. Para el análisis de seguridad (placebo, 82; perampanel, 81), los eventos adversos más frecuentes derivados del tratamiento con perampanel fueron los mareos (32,1%) y la fatiga (14,8%).

**Conclusiones:** El perampanel adyuvante fue bien tolerado y mejoró el control de las crisis TCGP fármaco-resistentes en pacientes con EGI.

**Clasificación de la evidencia:** Este estudio aporta evidencia Clase I de que el perampanel adyuvante reduce la frecuencia de crisis TCGP, comparado con placebo, en pacientes con crisis TCGP fármaco-resistentes en EGI. **Neurology® 2015;85:950-957** GLOSARIO

**AMPA** = ácido propiónico  $\alpha$ -amino-3-hidroxi-5-metil-4-isoxazol; **CGI-C** = Impresión Clínica Global de Cambio (*Clinical Global Impression of Change*); **DAE** = droga antiepiléptica; **EA** = evento adverso; **EAET** = evento adverso emergente del tratamiento; **EGI** = epilepsia generalizada idiopática; **ILAE** = Liga Internacional Contra la Epilepsia (*International League Against Epilepsy*); **SMQ** = Diccionario Médico Estandarizado para el cuestionario de Actividades Regulatorias (*Standardized Medical Dictionary for Regulatory Activities query*); **TCGP** = tónico-clónicas generalizadas primarias.

Pocas drogas antiepilépticas (DAE) tienen licencia para tratar las crisis tónico-clónicas generalizadas primarias (TCGP).<sup>1</sup> Un objetivo terapéutico aún no explorado en esta situación es el receptor glutamatérgico post-sináptico ácido propiónico  $\alpha$ -amino-3-hidroxi-5-metil-4-isoxazol (AMPA). Este receptor ha sido considerado un objetivo racional para los tratamientos de epilepsia porque es mediador de la mayoría de las transmisiones sinápticas excitatorias rápidas en el SNC y ha sido implicado en múltiples trastornos caracterizados por la sobreexcitación neuronal.<sup>2</sup> El antagonismo de los receptores AMPA ha sido asociado con efectos anti-epilépticos en ratas con amígdalas hiperfuncionantes, lo que indica una potencial eficacia clínica en los tipos de crisis generalizadas primarias.<sup>3-5</sup>

Del NYU Comprehensive Epilepsy Center (J.A.F.), New York, NY; Johns Hopkins Hospital (G.L.K.), Baltimore, MD; Idaho Comprehensive Epilepsy Center (R.T.W.), Boise, ID; The First Affiliated Hospital of Chongqing Medical University (X.-F.W.), China; The Epilepsy Study Consortium (B.D.), Herndon, VA; Bethel Epilepsy Center (C.B.), Bielefeld, Germany; Department of Neurology (E.T.), CDK, Paracelsus Medical University and Centre for Cognitive Neuroscience, Salzburg, Austria; Departments of Medicine and Neurology (T.J.O.), The Royal Melbourne Hospital, The University of Melbourne, Australia; Eisai Neuroscience Product Creation Unit (A.L., F.B.), Woodcliff Lake, NJ; y el Department of Biostatistics (A.P.), Eisai, Hatfield, UK.

Ir a [Neurology.org](http://Neurology.org) para declaraciones de intereses completas. La información sobre fondos y aquellas declaraciones relevantes para los autores, si existiesen, se encuentran al final del artículo.

El cargo para el procesamiento del artículo fue pagado por Eisai Inc.

Este es un artículo de acceso abierto distribuido bajo los términos de la *Creative Commons Attribution-NonCommercial-NoDerivatives License 4.0 (CCBY-NC-ND)*, que permite la descarga y compartir el trabajo siempre que sea correctamente citado. Este trabajo no puede ser cambiado de ninguna manera o usado comercialmente.

El antagonista no competitivo del receptor AMPA, perampanel, ha sido evaluado en 3 ensayos aleatorizados, doble ciego, controlados con placebo, en pacientes con crisis de inicio parcial, con o sin generalización secundaria, a pesar de recibir de 1 a 3 DAE. Con el uso adyuvante de perampanel a dosis diarias de 4 a 12 mg se observaron reducciones significativas en la frecuencia de todas las crisis de inicio parcial, y en la frecuencia de las crisis parciales complejas con generalización secundaria además de las crisis secundariamente generalizadas.<sup>6-9</sup> En consecuencia, el perampanel ahora está aprobado en más de 40 países alrededor del mundo para el tratamiento adyuvante de crisis de inicio parcial, con o sin crisis secundariamente generalizadas, en pacientes con epilepsia de 12 años de edad o más (18 años o más en Canadá).<sup>10,11</sup> La indicación de perampanel en los Estados Unidos y Europa se ha expandido recientemente para incluir el tratamiento adyuvante de crisis TCGP en pacientes con epilepsia generalizada idiopática (EGI) de  $\geq 12$  años de edad.

No se sabe si la eficacia contra las crisis secundariamente generalizadas en epilepsias focales se traslada a las crisis TCGP en la EGI. Este estudio evalúa la eficacia y seguridad del tratamiento adyuvante con perampanel en pacientes con crisis TCGP fármaco-resistentes asociadas a EGI.

**MÉTODOS Clasificación de la evidencia.** Pregunta de investigación primaria: ¿El perampanel adyuvante provee una opción efectiva para el tratamiento de las crisis TCGP fármaco-resistentes en adultos y adolescentes con EGI? Este estudio de intervención aporta evidencia Clase I de que el perampanel adyuvante a 8 mg reduce significativamente la frecuencia de crisis TCGP y mejora las tasas de respuesta del 50% de las crisis TCGP en pacientes de 12 años de edad o más con crisis TCGP fármaco-resistentes y EGI.

**Aprobaciones estándar del protocolo, registros y consentimiento de pacientes.** Este ensayo (Eisai Inc. protocolo: E2007-G000-332; ClinicalTrials.gov identifier: NCT01393743) fue desarrollado en 78 lugares en 16 países (Australia, Austria, China, República Checa, Francia, Alemania, Grecia, India, Israel, Japón, Letonia, Lituania, Polonia, Serbia, Corea del Sur, Estados Unidos). Fue realizado de acuerdo con la Declaración de Helsinki, Guía de Buena Práctica Clínica ICH-E6 CPMP/ICH/135/95, Directiva Europea de Buena Práctica Clínica 2005/28/EC y Directiva de Ensayos Clínicos 2001/20/EC, y código de Regulaciones Federales de EEUU Parte 21. El protocolo del ensayo, enmiendas y el consentimiento informado fueron revisados por las autoridades nacionales regulatorias en cada país y comités de ética independientes o comité de revisión institucional de cada lugar. Antes de su participación, todos los pacientes dieron su consentimiento informado por escrito.

**Pacientes.** Los pacientes tenían 12 años o más y diagnóstico de crisis TCGP y EGI de acuerdo a la clasificación de la

*International League Against Epilepsy* (ILAE) de 1981 de las crisis epilépticas<sup>12</sup> y las clasificación de la ILAE de 1989 de las epilepsias y síndromes epilépticos,<sup>13</sup> que estaban en uso cuando este estudio fue diseñado. El término “idiopático” (en EGI) es sinónimo de “genético” en la clasificación revisada de la ILAE del 2010 para las crisis y la epilepsia.<sup>14</sup>

Todos los diagnósticos fueron confirmados por revisores independientes del *Epilepsy Study Consortium* en base a la edad de inicio, datos de EEG, IQ, RM y descripciones de las crisis (apéndice e-1 en el sitio web de *Neurology*<sup>®</sup> en [Neurology.org](http://Neurology.org)). Los pacientes podían ser excluidos por información insuficiente para confirmar un diagnóstico de EGI (por ej., si el paciente tenía sólo crisis tónico-clónicas generalizadas y un EEG normal) o diagnóstico incorrecto de EGI (por ej., espiga-onda lenta, retraso madurativo o edad de inicio durante el primer año de vida). Si un paciente era considerado ilegible, la información era enviada a un segundo revisor independiente. Si ambos revisores estaban de acuerdo, el paciente fallaba el cribaje. Los pacientes también necesitaban haber tenido  $\geq 3$  crisis TCGP en su estado basal y estar tomando dosis estables de 1 a 3 DAE aprobadas.

**Diseño del ensayo.** Este fue un estudio multicéntrico, aleatorizado, doble ciego, controlado contra placebo, de grupos paralelos. Una fase de pre-aleatorización incluía el cribaje ( $\leq 4$  semanas) y el basal (4 u 8 semanas, dependiendo de la precisión de la documentación diaria de las crisis durante el cribaje). Los pacientes elegibles fueron aleatorizados (1:1) utilizando un sistema interactivo de respuesta por voz para recibir placebo o perampanel vía oral, estratificado por país. Una fase de aleatorización subsecuente comprendió la dosificación (semanas 1-4), el mantenimiento (semanas 5-17) y el seguimiento (semanas 18-21; sólo pacientes que no ingresaban a una fase de extensión). Durante la aleatorización, los pacientes y todo el personal, incluso investigadores, personal del lugar y equipo sponsor, fueron cegados al tratamiento. Las drogas del estudio fueron empaquetadas y etiquetadas para ser indistinguibles entre los grupos de tratamiento.

Durante la dosificación, los pacientes en el grupo de perampanel recibieron una dosis inicial de 2 mg, antes de subir la dosis en incrementos semanales de 2 mg hasta la dosis diaria final de 8 mg o la máxima dosis tolerada (la que sea menor). Los pacientes entraban en la fase de mantenimiento a la última dosis alcanzada en la dosificación. Los ajustes de dosis durante el período de mantenimiento no estaban recomendados; sin embargo, de acuerdo al criterio clínico del investigador, los pacientes con mal control de crisis podían tener un aumento de dosis de 2 mg (hasta un máximo de 8 mg por día), y los pacientes que experimentaban eventos adversos (EA) intolerables podían descender la dosis 2 mg.

**Evaluaciones de eficacia.** El recuento de crisis fue registrado en diarios del paciente. El punto final primario de eficacia fue el porcentaje de cambio en la frecuencia de crisis TCGP en 28 días (dosificación más mantenimiento *vs* basal). El punto final secundario clave fue la tasa de respuesta del 50% de crisis TCGP (porcentaje de pacientes que alcanzaron una reducción de  $\geq 50\%$  en la frecuencia de crisis TCGP durante el mantenimiento *vs* el basal; última observación llevada a cabo). Sin embargo, la tasa de respuesta del 50% de crisis TCGP fue diseñada como el punto final primario con un propósito de registro en la Unión Europea, de acuerdo a las guías de la Unión Europea.

El porcentaje de cambio en la frecuencia de crisis y la tasa de respuesta del 50% para todas las crisis también fueron evaluados como puntos finales de eficacia secundarios. Los puntos finales de eficacia exploratorios incluyeron tasas de libertad de crisis TCGP y de todas las crisis durante el mantenimiento, y la Impresión de Cambio Clínico Global (CGI-C, *Clinical Global Impression of Change*) evaluada por el investigador (evaluación del estado clínico a lo largo de 4 semanas antes de la semana 12, en una escala del 1 [mucha mejoría] al 7 [mucho peor]; última observación llevada a cabo).

**Evaluaciones de seguridad.** Las evaluaciones de seguridad incluyeron la monitorización de todos los EA emergentes del

tratamiento (EAET), discontinuaciones del tratamiento, resultados de pruebas clínicas de laboratorio (química, hematología y análisis urinario) y signos vitales.

Se utilizó una combinación amplia y reducida del Diccionario Médico Estandarizado para el cuestionario de Actividades Regulatorias (SMQ, *Standardized Medical Dictionary for Regulatory Activities queries*) para evaluar eventos en categorías pre-especificadas de interés especial: potencial abuso, accidente/injuria, alerta y cognición, EAET cardíacos y ECG, anomalías hepáticas relacionadas con la droga, caídas, hostilidad/agresión (una SMQ reducida también fue aplicada), psicosis y trastornos psicóticos (una SMQ reducida también fue aplicada), rash, status epiléptico/convulsiones, e ideación suicida y comportamiento.

**Análisis estadístico.** El análisis completo incluyó todos los pacientes aleatorizados que recibieron al menos una dosis de la droga en estudio y tenían cualquier dato de frecuencia de crisis post-basal. El análisis de seguridad incluyó todos los pacientes aleatorizados que recibieron al menos una dosis de la droga en estudio y tenían al menos una evaluación de seguridad post-basal.

Para el análisis de la frecuencia de crisis TCGP, los datos basales y de porcentaje de cambio fueron transformados en rangos por separado. El análisis de covarianza fue realizado con los datos de porcentaje de cambio transformados en rango con el tratamiento y los países en conjunto como factores y la frecuencia de crisis TCGP basal rankeada como una covariable. La diferencia de tratamiento fue estimada utilizando el estimador Hodges-Lehmann y se asociaron intervalos de confianza del 95%. Las diferencias de tratamiento para las tasas de respuesta del 50% de crisis TCGP y los puntajes de CGI-C fueron analizados utilizando la prueba Cochran-Mantel-Haenszel, estratificada por país en conjunto.

Para el porcentaje de cambio en la frecuencia de crisis TCGP, asumiendo un DE común del 60%, un tamaño de muestra de 82 pacientes por grupo de tratamiento aportó > 85% de poder para detectar una diferencia del 30% en base a la prueba Wilcoxon rank sum con un nivel de significancia bilateral de 0,05. Para la tasa de respuesta del 50% de crisis TCGP, asumiendo una tasa del 35% para el grupo placebo y 57% para el grupo de perampanel, un tamaño de muestra de 82 pacientes por grupo tuvo > 80% de poder para detectar diferencias entre grupos en la proporción de respondedores basados en una prueba de 2 grupos  $\chi^2$  con un nivel de significancia bilateral de 0,05.

## RESULTADOS Asignación y demografía de los pacientes.

El primer paciente fue enrolado en julio del 2011 y la última visita de paciente fue en mayo del 2014. De los 307 pacientes detectados (figura 1), 143 no fueron incluidos, principalmente por no alcanzar los criterios de inclusión (n = 117, de los cuales 70 fallaron en base a una revisión del *Epilepsy Study Consortium*, ya sea por un mal diagnóstico de EGI [n = 35] o información insuficiente para confirmar el diagnóstico [n = 35]). Los 164 pacientes restantes fueron aleatorizados (placebo n = 82; perampanel n = 82). Hubo 163 pacientes en el análisis de seguridad (placebo n = 82; perampanel n = 81) y 162 en el análisis completo (placebo n = 81; perampanel n = 81). La proporción de pacientes que completaron el estudio fue similar en los grupos de placebo y de perampanel (87,8% vs 84,0%, respectivamente). Se alcanzó una mediana de la dosis diaria de 8 mg en 65 pacientes (80,2%) tratados con perampanel; los 16 pacientes restantes (19,8%) alcanzaron una mediana de dosis diaria de 4 a < 8 mg.

Los grupos de placebo y perampanel fueron comparables en la demografía basal de los pacientes y la historia médica específica de epilepsia (tabla 1). Globalmente, las DAE utilizadas más frecuentemente en el basal fueron lamotrigina (64/163 pacientes; 39,3%), ácido valproico (55/163 pacientes; 33,7%), levetiracetam (51/163 pacientes; 31,3%) y topiramato (25/163 pacientes; 15,3%).

**Eficacia.** Durante la pre-aleatorización, la mediana de la frecuencia de crisis TCGP en 28 días (rango) fue 2,5 (1,0 – 11,7) para placebo y 2,6 (1,4 – 18,5) para perampanel; durante la fase de aleatorización, estas frecuencias bajaron a 1,6 (0,0 – 39,1) y 0,7 (0,0 – 22,8), respectivamente. Globalmente, en comparación con el placebo, el perampanel confirió una mayor mediana del porcentaje de cambio en la frecuencia de crisis TCGP en 28 días (-38,4%

Figura 1 Disposición de pacientes

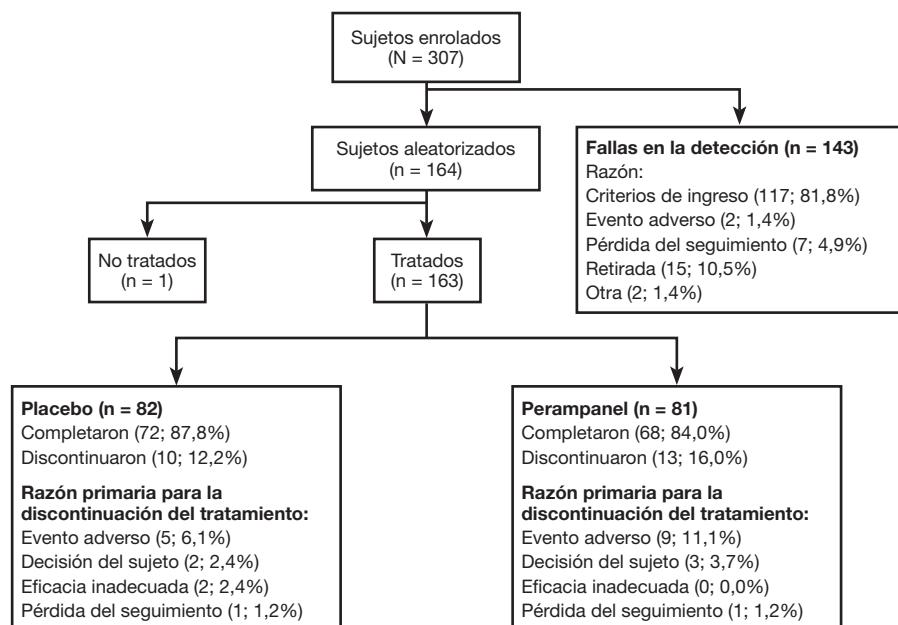

**Tabla 1** Características demográficas e historia médica específica de epilepsia basales de los pacientes

|                                                                       | Placebo     | Perampanel  | Total       |
|-----------------------------------------------------------------------|-------------|-------------|-------------|
| <b>Demografía; análisis completo</b>                                  |             |             |             |
| <b>N</b>                                                              | 81          | 81          | 162         |
| <b>Edad media, años (DE)</b>                                          | 29.5 (12.2) | 27.3 (10.5) | 28.4 (11.4) |
| <b>Mujeres, n (%)</b>                                                 | 45 (55,6)   | 46 (56,8)   | 91 (56,2)   |
| <b>Raza, n (%)</b>                                                    |             |             |             |
| Blanca                                                                | 43 (53,1)   | 44 (54,3)   | 87 (53,7)   |
| Negra o Afroamericana                                                 | 3 (3,7)     | 1 (1,2)     | 4 (2,5)     |
| Japonesa                                                              | 6 (7,4)     | 5 (6,2)     | 11 (6,8)    |
| China                                                                 | 18 (22,2)   | 18 (22,2)   | 36 (22,2)   |
| Otra asiática                                                         | 10 (12,3)   | 11 (13,6)   | 21 (13,0)   |
| Otra                                                                  | 1 (1,2)     | 2 (2,5)     | 3 (1,9)     |
| <b>Historia médica específica de epilepsia; análisis de seguridad</b> |             |             |             |
| <b>N</b>                                                              | 82          | 81          | 163         |
| <b>Tiempo medio desde el diagnóstico, años (DE)</b>                   | 18.6 (12.6) | 15.7 (10.8) | 17.2 (11.8) |
| <b>Tipo de crisis, n (%)<sup>a</sup></b>                              |             |             |             |
| Tónico-clónica                                                        | 82 (100,0)  | 81 (100,0)  | 163 (100,0) |
| Mioclónica                                                            | 33 (40,2)   | 32 (39,5)   | 65 (39,9)   |
| Ausencia                                                              | 41 (50,0)   | 42 (51,9)   | 83 (50,9)   |
| Clónica                                                               | 1 (1,2)     | 0 (0,0)     | 1 (0,6)     |
| Tónica                                                                | 2 (2,4)     | 0 (0,0)     | 2 (1,2)     |
| Atónica                                                               | 1 (1,2)     | 0 (0,0)     | 1 (0,6)     |
| <b>No. de DAE en el basal, n (%)</b>                                  |             |             |             |
| 1                                                                     | 29 (35,4)   | 26 (32,1)   | 55 (33,7)   |
| 2                                                                     | 36 (43,9)   | 39 (48,1)   | 75 (46,0)   |
| 3                                                                     | 16 (19,5)   | 16 (19,8)   | 32 (19,6)   |
| 4                                                                     | 1 (1,2)     | 0 (0,0)     | 1 (0,6)     |

Abreviatura: DAE = droga antiepiléptica.

<sup>a</sup> Nótese que un paciente puede tener  $\geq 1$  tipo de crisis.

*vs* -76,5%;  $p < 0,0001$ ) y estuvo asociado con una mayor tasa de respuesta del 50% de crisis TCGP (39,5% *vs* 64,2%;  $p = 0,0019$ ; figura 2).

Comparado con placebo, también hubo una mayor mediana del porcentaje de cambio en la frecuencia de todas las crisis en 28 días en el grupo de perampanel (-22,9 *vs* -43,4;  $p = 0,0018$ ). Durante el período de mantenimiento, 12,3% de los pacientes tratados con placebo y 30,9% de los pacientes tratados con perampanel, lograron permanecer libres de crisis TCGP; 4,9% de los pacientes tratados con placebo y 23,5% de los pacientes tratados con perampanel lograron permanecer libres de todas las crisis.

En la semana 12, el 32,9% de los pacientes tratados con placebo y el 39,2% de los pacientes tratados con perampanel mejoraron “mucho” o “muchísimo” de acuerdo a los puntajes CGI-C ( $p = 0,5639$ ).

**Seguridad.** Se reportaron EAET en 59 pacientes tratados con placebo (72,0%) y en 67 pacientes tratados con perampanel (82,7%), siendo la mayoría de intensidad leve a moderada (ocurrieron EAET severos en 6 pacientes de cada grupo de tratamiento). Los EAET más frecuentemente reportados con el perampanel ( $\geq 10\%$ ) fueron mareos, fatiga, cefalea, somnolencia e irritabilidad (tabla 2). Los EAET serios afectaron de forma similar a los pacientes trata-

**Figura 2** Mediana del porcentaje de cambio en la frecuencia de crisis TCGP y tasa de respuesta del 50% de crisis TCGP

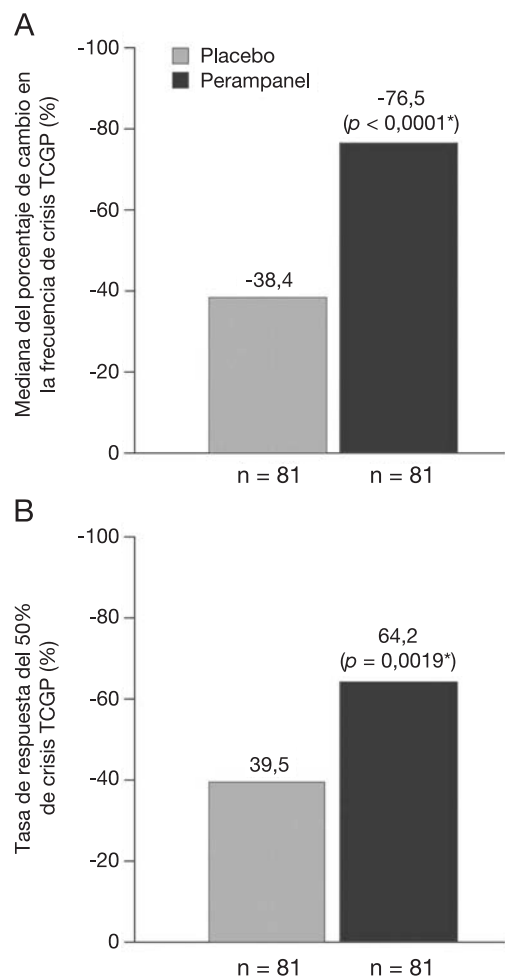

(A) Mediana del porcentaje de cambio en la frecuencia de crisis por 28 días (análisis completo). (B) Tasa de respuesta del cincuenta por ciento de crisis TCGP (porcentaje de pacientes que alcanzaron una reducción en la frecuencia de crisis  $\geq 50\%$  durante el mantenimiento *vs* el basal; análisis completo). \**Versus* placebo. TCGP = crisis tónico-clónicas generalizadas primarias.

dos con placebo (n = 7; 8,5%) y perampanel (n = 6; 7,4%; tabla 3). Los EAET más serios fueron transitorios y manejables, pero hubo 2 muertes: un caso probable de muerte súbita inesperada en epilepsia en el grupo placebo y un ahogo accidental en el grupo de perampanel. Un paciente que recibía perampanel 6 mg/d experimentó un status epiléptico; el evento fue clasificado como severo, pero resolvió, siguiendo la discontinuación del perampanel. Un paciente en el grupo placebo también experimentó un status epiléptico, clasificado como moderado.

Los EAET necesitaron la discontinuación en 5 pacientes tratados con placebo (6,1%) y en 9 pacientes tratados con perampanel (11,1%). De estos, 3 pacientes tratados con placebo (3,7%) y 5 pacientes tratados con perampanel (6,2%) discontinuaron el tratamiento luego de trastornos psiquiátricos. Para los 3 pacientes que recibieron placebo, estos eventos incluyeron 2 casos leves a

**Tabla 2 EAET reportados en  $\geq 5\%$  de los pacientes tratados con placebo o perampanel de los pacientes**

| EAET            | Placebo (n = 82) | Perampanel (n = 81) |
|-----------------|------------------|---------------------|
| Cualquier EAET  | 59 (72,0)        | 67 (82,7)           |
| Mareos          | 5 (6,1)          | 26 (32,1)           |
| Fatiga          | 5 (6,1)          | 12 (14,8)           |
| Cefalea         | 8 (9,8)          | 10 (12,3)           |
| Somnolencia     | 3 (3,7)          | 9 (11,1)            |
| Irritabilidad   | 2 (2,4)          | 9 (11,1)            |
| Nasofaringitis  | 7 (8,5)          | 7 (8,6)             |
| Vértigo         | 2 (2,4)          | 7 (8,6)             |
| Vómitos         | 2 (2,4)          | 7 (8,6)             |
| Aumento de peso | 3 (3,7)          | 6 (7,4)             |
| Contusión       | 3 (3,7)          | 5 (6,2)             |
| Náuseas         | 4 (4,9)          | 5 (6,2)             |

Abreviatura: EAET = evento adverso emergente del tratamiento.  
Los datos están en n (%).

moderados de ideación suicida y casos moderados de agitación, estado confusional y depresión; para los 5 pacientes que recibieron perampanel, estos eventos incluyeron un caso leve de agresión, casos moderados de ansiedad e insomnio, y casos severos de comportamiento anormal, cambios de humor, ideación suicida e intento de suicidio (los pacientes con 2 o más EA en la misma clase de órgano/sistema [o con el mismo término] están contados una sola vez). Otros EAET que llevaron a la discontinuación incluyeron 2 que afectaron a más de un paciente en el grupo de perampanel: mareos (n = 5) y vómitos (n = 2).

Los EAET necesitaron ajuste de dosis o interrupción en 6 pacientes tratados con placebo (7,3%) y en 9 pacientes tratados con perampanel

(11,1% [2 mg, n = 1; 6 mg, n = 2; 8 mg, n = 6]). Todos estos EAET resolvieron (la mayoría sin otra acción, aunque un caso de náuseas en el grupo de placebo requirió tratamiento), excepto un caso de mareos en el grupo de perampanel. Un paciente fue retirado luego de la interrupción del perampanel debido a EAET de agresión y vómitos. Las tasas más altas de ajuste de dosis o interrupción en el grupo de perampanel fueron atribuidas primariamente a los requerimientos de modificación de dosis en pacientes con trastornos del sistema nervioso, definidos de acuerdo al Diccionario Médico de Actividades Regulatorias (placebo [n = 4] vs perampanel [n = 8], o irritabilidad (placebo [n = 0] vs perampanel [n = 3])).

Los siguientes EAET de interés especial afectaron a más del 5% de los pacientes tratados con perampanel y fueron reportados con menos frecuencia con placebo que con perampanel: EAET relacionados con la alerta y la cognición (términos SMQ corto/amplio: 14,6% vs 19,8%), hostilidad agresión (términos SMQ corto/amplio: 4,9% vs 18,5%; términos angostos únicamente: 0,0% vs 2,5%), accidente/injuria (términos SMQ corto/amplio: 11,1% vs 14,6%), psicosis y trastornos psicóticos (términos SMQ corto/amplio: 3,7% vs 7,4%; términos angostos únicamente: 3,7% vs 3,7%) y rash (términos SMQ corto/amplio: 1,2% vs 6,2%). Otros EAET de especial interés fueron reportados en < 5% en ambos grupos de tratamiento, no se identificó EAET sugestivos de abuso potencial en ninguno de los grupos.

No hubo anomalías de laboratorio significativas. El aumento medio en el peso corporal fue numéricamente menor para el placebo (+0,1 kg) que para el perampanel (+1,8 kg). Tres pacientes tratados con placebo (3,7% tuvieron un aumento de peso corporal > 7% al final del tratamiento, en

**Tabla 3 EAET serios reportados en pacientes tratados con placebo o perampanel**

| Edad del paciente, años/sexo | EAET                 | Severidad | Día que empezó el EAET | Día que se resolvió el EAET | Relación con la droga en estudio | Acción tomada con la droga en estudio | Situación en el último seguimiento |
|------------------------------|----------------------|-----------|------------------------|-----------------------------|----------------------------------|---------------------------------------|------------------------------------|
| <b>Placebo</b>               |                      |           |                        |                             |                                  |                                       |                                    |
| 42/M                         | Convulsión           | Moderada  | 12                     | 12                          | No relacionado                   | Sin cambio de dosis                   | Resuelto                           |
|                              |                      |           | 15                     | 20                          |                                  |                                       |                                    |
| 25/F                         | Caída                | Moderada  | 75                     | 89                          | No relacionado                   | Sin cambio de dosis                   | Resuelto                           |
| 35/F                         | Convulsión gran mal  | Leve      | 40                     | 40                          | Posiblemente relacionado         | Sin cambio de dosis                   | Resuelto                           |
|                              | Convulsión gran mal  | Moderada  | 106                    | 106                         | Posiblemente relacionado         | Sin cambio de dosis                   | Resuelto                           |
| 46/M                         | Náuseas              | Severa    | 10                     | 20                          | No relacionado                   | Reducción de dosis                    | Resuelto                           |
| 21/M                         | Status epiléptico    | Moderada  | 31                     | 34                          | No relacionado                   | Sin cambio de dosis                   | Resuelto                           |
| 27/F                         | SUDEP                | Fatal     | 11                     | 11                          | No relacionado                   | Retiro de droga                       | Fatal                              |
| 20/M                         | Quemadura térmica    | Severa    | 62                     | Actual                      | No relacionado                   | Sin cambio de dosis                   | Resolviendo                        |
| <b>Perampanel</b>            |                      |           |                        |                             |                                  |                                       |                                    |
| 22/F                         | Colecistitis crónica | Severa    | 24                     | 32                          | No relacionado                   | Sin cambio de dosis                   | Resuelto                           |
|                              | Status epiléptico    | Severa    | 26                     | 30                          | Probablemente relacionado        | Retiro de droga                       | Resuelto                           |
| 15/F                         | Constipación         | Moderada  | 42                     | 51                          | No relacionado                   | Sin cambio de dosis                   | Resuelto                           |
| 29/M                         | Convulsión           | Moderada  | 117                    | 119                         | No relacionado                   | Sin cambio de dosis                   | Resuelto                           |
| 20/M                         | Ahogamiento          | Fatal     | 64                     | 64                          | No relacionado                   | Retiro de droga                       | Fatal                              |
| 35/F                         | Intento de suicidio  | Severa    | 60                     | 79                          | Posiblemente relacionado         | Retiro de droga                       | Resuelto                           |
| 30/F                         | Ideación suicida     | Severa    | 85                     | 88                          | Posiblemente relacionado         | Retiro de droga                       | Resuelto                           |

Abreviaturas: EAET = evento adverso emergente del tratamiento; SUDEP = muerte súbita e inesperada en epilepsia.

comparación con 9 pacientes tratados con perampanel (11,1%; solo 2 casos de > 7% de ganancia de peso ocurrió en adolescentes menores de 17 años, ambos en el grupo de perampanel).

**DISCUSIÓN** A pesar de la percepción de que la EGI y sus crisis asociadas son fácilmente tratables, las investigaciones sugieren que aproximadamente entre 35% y 40% de los pacientes con síndromes de EGI (epilepsia con gran mal en el despertar, epilepsia mioclónica juvenil o epilepsia de ausencias en la infancia/juvenil) pueden no alcanzar la remisión de crisis a largo plazo.<sup>15-19</sup> De todos los tipos de crisis asociadas a la EGI, las crisis TCGP son tal vez las más serias y un factor de riesgo conocido de muerte súbita inesperada en epilepsia.<sup>20-25</sup> Sin embargo, una revisión de la evidencia reciente apoya el uso de solamente 4 DAE para el tratamiento de crisis TCGP (lamotrigina, levetiracetam, topiramato y ácido valproico), con evidencia para la zonisamida considerada de bajo nivel.<sup>1</sup> De estas, sólo lamotrigina, levetiracetam y topiramato han demostrado su eficacia en ensayos aleatorizados, doble ciego, controlados contra placebo, del tratamiento adyuvante para crisis TCGP fármaco-resistentes.<sup>26-30</sup> Mientras que las metodologías son variables, el tamaño de las muestras totales en estos estudios va de 45 a 164 pacientes, y medianas de la reducción en la frecuencia de crisis TCGP entre -56,7% con topiramato (*vs* 9,0% con placebo; *p* = 0,019) y -77,6% con levetiracetam (*vs* -44,6% con placebo; *p* < 0,001).

Este ensayo aleatorizado, doble ciego, controlado contra placebo, demuestra la eficacia del tratamiento adyuvante de perampanel para el control de crisis TCGP fármaco-resistentes en pacientes con EGI. El tamaño de la muestra completa de análisis (*n* = 162) y la magnitud de la mediana de la reducción en la frecuencia de crisis TCGP (-76,5%) se compara favorablemente con estudios previos de otras DAE. La tasa de libertad de crisis TCGP en el período de mantenimiento (placebo [12,3%] *vs* perampanel [30,9%]) también es esperanzadora, dado que la mayor tasa de libertad de crisis TCGP reportada en un marco así es de 34,2% con levetiracetam (*vs* placebo, 10,7%).<sup>26</sup> Estas observaciones son particularmente notables dado que los pacientes del presente estudio estaban experimentando crisis TCGP a pesar de estar recibiendo hasta 3 DAE al momento de empezar, que comúnmente incluían aquellas descritas arriba como el tratamiento recomendado de las crisis TCGP (lamotrigina, levetiracetam, topiramato y ácido valproico). Esto puede ser indicativo de una epilepsia más refractaria que en los estudios previos, donde los pacientes estaban limitados a 2 DAE de base.

Hasta ahora, este estudio es novedoso en su uso de una revisión externa de cada paciente enrolado para asegurarse del enrolamiento de una población pura de pacientes con EGI, y para excluir pacientes con epilepsia no clasificada y de diagnóstico incierto. Este enfoque fue apoyado por la revisión independiente de cada diagnóstico por el *Epilepsy Study Consortium*. Notablemente, 70 de los 307 pacientes

anotados para su enrolamiento por sitios de investigación, no fueron aprobados por el *Epilepsy Study Consortium* ya sea porque no tenían EGI o porque había información insuficiente para confirmar el diagnóstico. En contraste, no hubo estandarización de los diagnósticos de EGI entre los diferentes centros de reclutamiento en el estudio previo de levetiracetam; se vio actividad de espigas onda de 3- a 5-Hz sólo en 129 de 164 pacientes, y el diagnóstico de EGI fue “confirmado o sospechado” en 158 de 164 pacientes.<sup>26</sup> Mientras que otros estudios no especificaron la EGI como criterio de inclusión, la evidencia sugiere que las poblaciones pueden no haber sido puras. En un estudio de lamotrigina (*n* = 117), muchos pacientes tenían un EEG de base normal (*n* = 39) o estaban experimentando crisis no típicamente vistas en la EGI (crisis tónicas [*n* = 11] o crisis atónicas [*n* = 2]).<sup>28</sup> En un estudio con topiramato (*n* = 80), de nuevo, muchos pacientes experimentaban crisis no típicas de la EGI (crisis tónicas [*n* = 19] o crisis de ausencia atípicas [*n* = 6]).<sup>27</sup>

Una consideración importante para el tratamiento de las crisis asociadas con la EGI es el potencial de mejorar el control de las crisis TCGP, exacerbando otros subtipos de crisis.<sup>31-33</sup> Aunque este estudio no fue diseñado para evaluar el impacto de perampanel en la frecuencia de subtipos de crisis mioclónicas o de ausencia, y no todos los pacientes tenían historia de crisis mioclónicas o de ausencia (tabla 1), no hubo evidencia de exacerbación de estos subtipos de crisis.

El perampanel fue bien tolerado sin preocupaciones de seguridad nuevas o inesperadas. El perfil de EAET fue similar al observado en estudios previos de fase III en pacientes con crisis de inicio parcial fármaco-resistentes, en los cuales los EAET más frecuentes fueron mareos, fatiga, cefalea, irritabilidad y somnolencia, como se reportó acá.<sup>9</sup> Algunos EA de especial interés aparecieron más frecuentemente con perampanel que con placebo, incluyendo esa relacionados con hostilidad/agresión, que nuevamente es consistente con los datos previos de fase III. Casi todos los EAET que llevaron a una reducción de dosis o interrupción luego resolvieron, lo que sugiere efectos dosis-dependientes. Los EAET requirieron discontinuación en 9 pacientes tratados con perampanel (11,1%; *vs* placebo, 6,1%), de los cuales 5 discontinuaron el tratamiento seguido de trastornos psiquiátricos (6,2%; *vs* placebo, 3,7%).

Mientras que una limitación del estudio puede ser la corta duración del tratamiento de sólo 17 semanas, los pacientes tenían la opción de recibir subsecuentemente perampanel adyuvante por 142 semanas en una fase de extensión abierta. Esta fase de extensión está en marcha, pero se anticipa que va a aportar conocimientos adicionales de la eficacia y la seguridad del perampanel adyuvante para el tratamiento de crisis TCGP fármaco-resistentes en un escenario a largo plazo.

Globalmente, el perampanel adyuvante a 8 mg fue bien tolerado y efectivo en la mejoría del control de crisis en este estudio aleatorizado, doble ciego, controlado contra placebo, de grupos paralelos,

en pacientes de 12 años o más, con crisis TCGP en EGI. Junto con datos previos que demuestran la eficacia en pacientes con crisis de inicio parcial,<sup>6-9</sup> esto indica que el perampanel puede ser considerada una DAE de amplio espectro, que puede ser efectiva en crisis tanto de inicio parcial como generalizado.

#### CONTRIBUCIONES DE LOS AUTORES

J.A.F.: contribuyó a la interpretación de datos, preparó el esquema inicial y cada borrador del manuscrito, acepta responsabilidad por todos los aspectos del trabajo. G.L.K.: contribuyó a la interpretación de datos, revisó críticamente cada borrador del manuscrito, acepta responsabilidad por todos los aspectos del trabajo.

R.T.W.: contribuyó a la interpretación de datos, revisó críticamente cada borrador del manuscrito, acepta responsabilidad por todos los aspectos del trabajo. X.-F.W.: contribuyó a la interpretación de datos, revisó críticamente cada borrador del manuscrito, acepta responsabilidad por todos los aspectos del trabajo. B.D.: contribuyó a la interpretación de datos, revisó críticamente cada borrador del manuscrito, acepta responsabilidad por todos los aspectos del trabajo. C.B.: contribuyó a la interpretación de datos, revisó críticamente cada borrador del manuscrito, acepta responsabilidad por todos los aspectos del trabajo. E.T.: contribuyó a la interpretación de datos, revisó críticamente cada borrador del manuscrito, acepta responsabilidad por todos los aspectos del trabajo. T.J.O.: contribuyó a la interpretación de datos, revisó críticamente cada borrador del manuscrito, acepta responsabilidad por todos los aspectos del trabajo. A.L.: contribuyó a la interpretación de datos, revisó críticamente cada borrador del manuscrito, acepta responsabilidad por todos los aspectos del trabajo. A.P.: contribuyó a la interpretación de datos, revisó críticamente cada borrador del manuscrito, acepta responsabilidad por todos los aspectos del trabajo. E.B.: contribuyó a la interpretación de datos, con el esquema inicial del manuscrito, revisó críticamente cada borrador del manuscrito, acepta responsabilidad por todos los aspectos del trabajo.

#### FONDOS PARA EL ESTUDIO

El ensayo y los análisis estuvieron respaldados por Eisai Inc. La edición del manuscrito, bajo la dirección de los autores, fue realizada por Hannah FitzGibbon y Ann Gordon of Complete Medical Communications, con el respaldo de Eisai Inc.

#### DECLARACIÓN DE INTERESES

J. French es presidente de Epilepsy Study Consortium, y el NYU Comprehensive Epilepsy Center y recibe un salario del consortium; ha actuado como consultor de Acorda, Alexza, BioPharm Solutions, Biotie Therapies, Brabant Pharma, Eisai Medical Research, Georgia Regents University, GlaxoSmithKline, GW Pharmaceuticals, Marinus, Novartis, Pfizer, Pfizer-Neusentis, SK Life Science, Sunovion, Supernus Pharmaceuticals, Takeda, UCB/Schwarz Pharma, Ultragenyx, y Upsher-Smith (todas las consultas hechas como parte del Epilepsy Study Consortium, y los cargos pagados al consortium); ha sido investigador en ensayos clínicos a cargo de Acorda, Alexza, Eisai, LCGH, Novartis, Supernus Pharmaceuticals, Upsher-Smith y Vertex; y ha recibido becas de Eisai, Lundbeck, Pfizer, UCB, the Epilepsy Therapy Project, la Epilepsy Research Foundation y el Epilepsy Study Consortium. G. Krauss ha recibido compensación personal por estar en el comité de seguridad de Lundbeck y por consultas de Sunovion; y ha recibido apoyo para investigación de Eisai, SK Life Science, Sunovion, UCB Pharma y el NIH. R. Wechsler ha recibido compensación como consultor y/o comités y/o honorarios por disertante de Cyberonics, Eisai, Gerson Lehrman Group Inc., Lundbeck, Sunovion, UCB, y Upsher-Smith; sirve como director del Corporate Advisory Committee; es miembro del Development Committee of the American Epilepsy Society y miembros del Epilepsy Study Consortium; y es investigador de ensayos clínicos patrocinados por Alexza, Eisai, Lundbeck, Marinus, Pfizer, SK Life Science, Sunovion, UCB, Upsher-Smith y Vertex. X. Wang no tiene nada que declarar relevante al manuscrito. B. DiVentura es empleado del Epilepsy Study Consortium, que ha recibido fondos para apoyo de investigación y servicios aportados por las siguientes compañías el año pasado: Acorda, Alexza, BioPharm Solutions, Biotie Therapies, Brabant Pharma, Eisai Medical Research, Georgia Regents University, GlaxoSmithKline, GW Pharma Ltd., Marinus, Novartis, Pfizer, Pfizer-Neusentis, SK Life Science, Sunovion, Supernus Pharmaceuticals, Takeda, UCB Inc./Schwarz Pharma, Ultragenyx y Upsher-Smith. C. Brandt ha recibido compensación personal de Eisai, Otsuka, Pfizer y UCB por servir en los comités científicos o por disertar o viajes a congresos; su institución ha recibido apoyo financiero para actividades de investigación de Otsuka y UCB. E. Trinka ha actuado como consultor pago para Bial, Biogen, Eisai, EVER Neuro Pharma, Medtronic, Takeda, UCB y Upsher-Smith; ha recibido honorarios como disertante de Bial, Boehringer, Eisai, GL Lannacher y UCB Pharma; y ha

recibido fondos para investigación de Biogen, Merck, Novartis, Red Bull, UCB Pharma, la European Union, FWF (Österreichischer Fond zur Wissenschaftsförderung) y Bundesministerium für Wissenschaft und Forschung. T. O'Brien ha recibido compensación por hablar en simposios de SciGen y UCB Pharma; y su institución recibió fondos para investigación de Eisai, Sanofi-Genzyme, SciGen, Janssen-Cilag y UCB Pharma. A. Laurenza es empleado de Eisai Inc. A. Patten es empleado de Eisai Ltd. F. Bibbiani es empleado de Eisai Inc. Ir a [Neurology.org](http://Neurology.org) para declaraciones completas.

*Recibido el 12 de febrero del 2015. Aceptado en su formato final el 21 de mayo del 2015.*

#### BIBLIOGRAFÍA

1. Rheims S, Ryvlin P. Pharmacotherapy for tonic-clonic seizures. *Expert Opin Pharmacother* 2014;15:1417-1426.
2. Hanada T, Yang H, Ido K, Laurenza A. AMPA Receptor Antagonists for the Treatment of CNS Disorders: Antiepileptics and Beyond. *Frontiers in Clinical Drug Research (Volume 3): CNS and Neurological Disorders*. Sharjah, UAE: Bentham Science Publishers; 2015:34-76.
3. Durmuller N, Craggs M, Meldrum BS. The effect of the non-NMDA receptor antagonist GYKI 52466 and NBQX and the competitive NMDA receptor antagonist D-CPPene on the development of amygdala kindling and on amygdala-kindled seizures. *Epilepsy Res* 1994;17:167-174.
4. Kodama M, Yamada N, Sato K, et al. Effects of YM90K, a selective AMPA receptor antagonist, on amygdala-kindling and long-term hippocampal potentiation in the rat. *Eur J Pharmacol* 1999;374:11-19.
5. Wu T, Nagaya Y, Hanada T. Pharmacodynamic and pharmacokinetic interactions of perampanel and other antiepileptic drugs in a rat amygdala kindling model. *Seizure* 2014;23:732-739.
6. French JA, Krauss GL, Biton V, et al. Adjunctive perampanel for refractory partial-onset seizures: randomized phase III study 304. *Neurology* 2012;79:589-596.
7. French JA, Krauss GL, Steinhoff BJ, et al. Evaluation of adjunctive perampanel in patients with refractory partial-onset seizures: results of randomized global phase III study 305. *Epilepsia* 2013;54:117-125.
8. Krauss GL, Serratos JM, Villanueva V, et al. Randomized phase III study 306: adjunctive perampanel for refractory partial-onset seizures. *Neurology* 2012;78:1408-1415.
9. Steinhoff BJ, Ben-Menachem E, Ryvlin P, et al. Efficacy and safety of adjunctive perampanel for the treatment of refractory partial seizures: a pooled analysis of three phase III studies. *Epilepsia* 2013;54:1481-1489.
10. European Medicines Agency. Fycompa summary of product characteristics. Available at: [http://www.ema.europa.eu/docs/en\\_GB/document\\_library/EPAR\\_-\\_Product\\_Information/human/002434/WC500130815.pdf](http://www.ema.europa.eu/docs/en_GB/document_library/EPAR_-_Product_Information/human/002434/WC500130815.pdf). Accessed August 7, 2015.
11. Food and Drug Administration. Fycompa prescribing information. Available at: [http://www.accessdata.fda.gov/drugsatfda\\_docs/label/2015/202834s0051bl.pdf](http://www.accessdata.fda.gov/drugsatfda_docs/label/2015/202834s0051bl.pdf). Accessed August 7, 2015.
12. Proposal for revised clinical and electroencephalographic classification of epileptic seizures. From the Commission on Classification and Terminology of the International League Against Epilepsy. *Epilepsia* 1981;22:489-501.
13. Proposal for revised classification of epilepsies and epileptic syndromes. Commission on Classification and Terminology of the International League Against Epilepsy. *Epilepsia* 1989;30:389-399.
14. Berg AT, Millichap JJ. The 2010 revised classification of seizures and epilepsy. *Continuum* 2013;19:571-597.

15. Holtkamp M, Kowski AB, Merkle H, Janz D. Long-term outcome in epilepsy with grand mal on awakening: forty years of follow-up. *Ann Neurol* 2014;75:298–302.
16. Senf P, Schmitz B, Holtkamp M, Janz D. Prognosis of juvenile myoclonic epilepsy 45 years after onset: seizure outcome and predictors. *Neurology* 2013;81:2128–2133.
17. Trinka E, Baumgartner S, Unterberger I, et al. Long-term prognosis for childhood and juvenile absence epilepsy. *J Neurol* 2004;251:1235–1241.
18. Unterberger I, Trinka E, Luef G, Bauer G. Idiopathic generalized epilepsies with pure grand mal: clinical data and genetics. *Epilepsy Res* 2001;44:19–25.
19. Höfler J, Unterberger I, Dobesberger J, Kuchukhidze G, Walsler G, Trinka E. Seizure outcome in 175 patients with juvenile myoclonic epilepsy: a long-term observational study. *Epilepsy Res* 2014;108:1817–1824.
20. Asadi-Pooya AA, Nikseresht A, Yaghoubi E, Nej M. Physical injuries in patients with epilepsy and their associated risk factors. *Seizure* 2012;21:165–168.
21. Hesdorffer DC, Tomson T, Benn E, et al. Combined analysis of risk factors for SUDEP. *Epilepsia* 2011;52:1150–1159.
22. Hesdorffer DC, Tomson T, Benn E, et al. Do antiepileptic drugs or generalized tonic-clonic seizure frequency increase SUDEP risk? A combined analysis. *Epilepsia* 2012;53:249–252.
23. Monte CP, Arends JB, Tan IY, Aldenkamp AP, Limburg M, de Krom MC. Sudden unexpected death in epilepsy patients: risk factors. A systematic review. *Seizure* 2007;16:1–7.
24. Tomson T, Beghi E, Sundqvist A, Johannessen SI. Medical risks in epilepsy: a review with focus on physical injuries, mortality, traffic accidents and their prevention. *Epilepsy Res* 2004;60:1–16.
25. Ryvlin P, Nashef L, Lhatoo SD, et al. Incidence and mechanisms of cardiorespiratory arrests in epilepsy monitoring units (MORTEMUS): a retrospective study. *Lancet Neurol* 2013;12:966–977.
26. Berkovic SF, Knowlton RC, Leroy RF, Schiemann J, Falter U. Placebo-controlled study of levetiracetam in idiopathic generalized epilepsy. *Neurology* 2007;69:1751–1760.
27. Biton V, Montouris GD, Ritter F, et al. A randomized, placebo-controlled study of topiramate in primary generalized tonic-clonic seizures. Topiramate YTC Study Group. *Neurology* 1999;52:1330–1337.
28. Biton V, Sackellares JC, Vuong A, Hammer AE, Barrett PS, Messenheimer JA. Double-blind, placebo-controlled study of lamotrigine in primary generalized tonic-clonic seizures. *Neurology* 2005;65:1737–1743.
29. Biton V, Di Memmo J, Shukla R, et al. Adjunctive lamotrigine XR for primary generalized tonic-clonic seizures in a randomized, placebo-controlled study. *Epilepsy Behav* 2010;19:352–358.
30. Trevathan E, Kerls SB, Hammer AE, Vuong A, Messenheimer JA. Lamotrigine adjunctive therapy among children and adolescents with primary generalized tonic-clonic seizures. *Pediatrics* 2006;118:e371–e378.
31. Gelisse P, Genton P, Kuate C, Pesenti A, Baldy-Moulinier M, Crespel A. Worsening of seizures by oxcarbazepine in juvenile idiopathic generalized epilepsies. *Epilepsia* 2004;45:1282–1286.
32. Genton P, Gelisse P, Thomas P, Dravet C. Do carbamazepine and phenytoin aggravate juvenile myoclonic epilepsy? *Neurology* 2000;55:1106–1109.
33. Thomas P, Valton L, Genton P. Absence and myoclonic status epilepticus precipitated by antiepileptic drugs in idiopathic generalized epilepsy. *Brain* 2006;129:1281–1292.
